# Supplementary material for: Configuration-dependent hollow heterostructures for highly efficient photocatalytic hydrogen evolution
Source: Royal Society of Chemistry journal article supplement (doi:10.1039/d4tc02562h), 2024-01-01
Supplement: d4tc02562h1.pdf [file d4tc02562h1.pdf]

## Supporting Information

### Configuration-Dependent Hollow Heterostructures for Highly Efficient Photocatalytic Hydrogen Evolution

*Yingqiang Li<sup>#</sup>, Tao Zhang<sup>#</sup>, Yifan Liu, Chao Liu, Jingwen Sun, Jianfei Che\*, Pan Xiong\*, Junwu Zhu*

Key Laboratory for Soft Chemistry and Functional Materials of Ministry of Education, School of Chemistry and Chemical Engineering, Nanjing University of Science and Technology, Nanjing 210094, China

<sup>#</sup>These authors contributed equally.

\*Corresponding author: [xiaoche@mail.njust.edu.cn](mailto:xiaoche@mail.njust.edu.cn); [pan.xiong@njust.edu.cn](mailto:pan.xiong@njust.edu.cn)

## **Experimental**

### ***Chemicals***

Sodium dodecyl sulfate ( $\text{C}_{12}\text{H}_{25}\text{SO}_4\text{Na}$ , SDS), potassium persulfate ( $\text{K}_2\text{S}_2\text{O}_8$ , KPS), styrene ( $\text{C}_8\text{H}_8$ ), titanium dioxide ( $\text{TiO}_2$ ), potassium carbonate ( $\text{K}_2\text{CO}_3$ ), lithium carbonate ( $\text{Li}_2\text{CO}_3$ ), tetrabutylammonium hydroxide ( $\text{C}_{16}\text{H}_{37}\text{NO}$ ), poly dimethyl diallyl ammonium chloride (PDDA,  $\text{C}_8\text{H}_{16}\text{NCl}_n$ ), hydrochloric acid (HCl), and urea ( $\text{CH}_4\text{N}_2\text{O}$ ) were procured from Aladdin Chemistry Co. Ltd. All chemicals were of analytical reagent grade and used without further purification.

### ***Material characterization***

Phase analysis of the samples was conducted using X-ray powder diffraction (XRD) on a Rigaku/MiniFlex600 instrument. Surface functional groups and chemical compositions of the products were characterized using Fourier transform infrared spectroscopy (FT-IR, NICOLETIS10) and X-ray photoelectron spectroscopy (XPS, ESCALAB250Xi). Morphological structures of the products were examined using a scanning electron microscope (SEM, Hitachi S4800) and a transmission electron microscope (TEM, JEOL JEM-2100) operated at 200 kV. Optical properties of the products were assessed using UV-vis diffuse-reflectance spectroscopy (UV-2550) and photoluminescence spectroscopy (PL, FLS1000) at room temperature. Reactive oxygen species (ROS), including electrons ( $\text{e}^-$ ) and holes ( $\text{h}^+$ ), in the composite solutions were identified and quantified using electron spin resonance spectroscopy (ESR, JESFA200).

### ***Photocatalytic activity***

Photocatalytic hydrogen production was quantified using an online system (LbSolar-3AG, PerfectLight, Beijing). 10 mg of the photocatalysts were dispersed in a 100 mL aqueous solution consisting of 90 mL water and 10 mL triethanolamine. Pt (serving as a co-catalyst) was subsequently deposited onto the material using the photo-deposition method. A solution of  $\text{H}_2\text{PtCl}_6 \cdot 6\text{H}_2\text{O}$  at 3 wt.% (relative to Pt) was introduced, degassed, and subsequently irradiated with a 300 W Xenon lamp (PLS-SXE 300C (BF), PerfectLight, Beijing) equipped with an AM-1.5 filter or an optical filter ( $\lambda > 420 \text{ nm}$ ). Gas concentration was analyzed using an online gas chromatograph (GC D7900P, TCD

detector). Thermogravimetric analysis (TGA, TGA5500) was employed to assess sample weight loss, with a heating rate of 10 °C/min from room temperature to 800 °C.

### ***Photoelectrochemical Experiments***

Electrochemical impedance spectroscopy (EIS), transient photocurrent and Mott-Schottky plots were tested on CHI 660E (Chenhua Instrument, Shanghai, China) with a typical three-electrode cell employed 0.2 M Na<sub>2</sub>SO<sub>4</sub> aqueous solution as the electrolyte. Ag/AgCl electrode and Pt wire were used as reference and counter electrodes, respectively. The working electrode was prepared as follows: 5 mg of photocatalyst was dispersed into mixed solution including ethanol (250  $\mu$ L), ethylene glycol (250  $\mu$ L), and Nafion (40  $\mu$ L) and then sonicated for 20 min. Then, the above solution (80  $\mu$ L) was dropped onto a precleaned fluorine tin oxide (FTO) glass with an exposed area of 1 cm<sup>2</sup>. A 300 W Xenon (Xe) lamp equipped with a 420 nm cutoff filter served as the visible light source. The photocurrent responses of the photocatalysts to light switching on and off were measured with 1.2 V bias voltage. EIS spectra were recorded in the range from 0.01 to 10<sup>5</sup> Hz at an ac voltage of 10 mV. Mott-Schottky plots of material were then tested at 500 Hz frequencies by using the Impedance-Potential mode.

### ***Theoretical calculation***

The density functional theory (DFT) calculations were performed by Vienna Ab-initio simulation package (VASP). The exchange and correlation interactions were calculated by using generalized-gradient approximations (GGA) and Perdew-Burke-Ernzerhof (PBE) functional. For the calculation of electronic properties, the more accurate hybrid functional Heyd-Scuseria-Ernzerhof (HSE06) was also used to correct the results. The energy cutoff of electron wave functions was set to 600 eV and the k-point meshes of 6  $\times$  4  $\times$  1 are used. The calculated lattice parameters of anatase TiO<sub>2</sub> are a = b = 3.784 Å and c = 9.515 Å. The optimized lattice parameters of monolayer g-C<sub>3</sub>N<sub>4</sub> are a = b = 4.785 Å. All the atomic positions are fully relaxed until the force is smaller than 0.01 eV/Å and the energy tolerances less than 1.0  $\times$  10<sup>-6</sup> eV per atom.

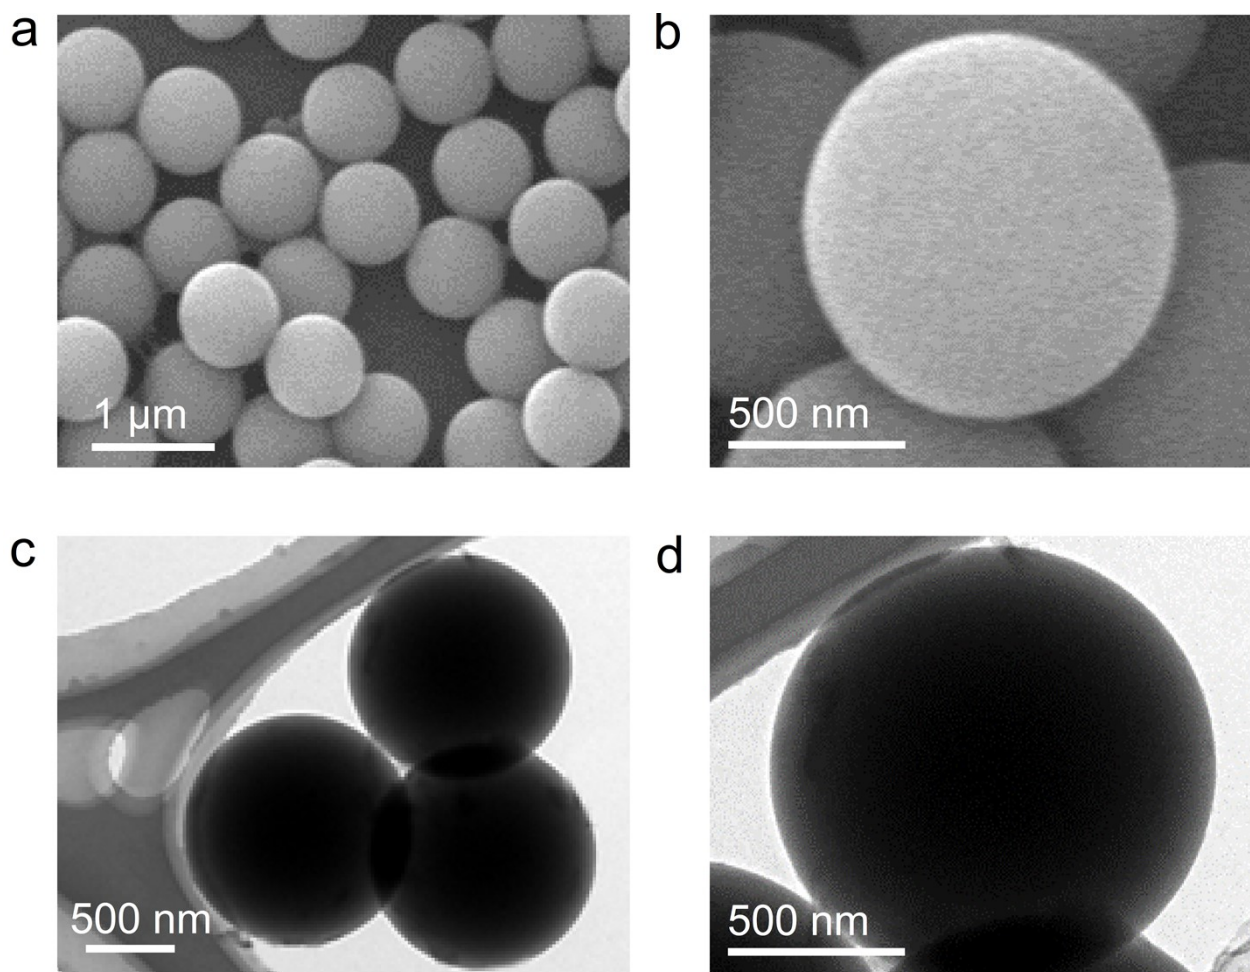

**Figure S1** (a-b) SEM and (c-d) TEM images of PS microsphere modified with PDPA.

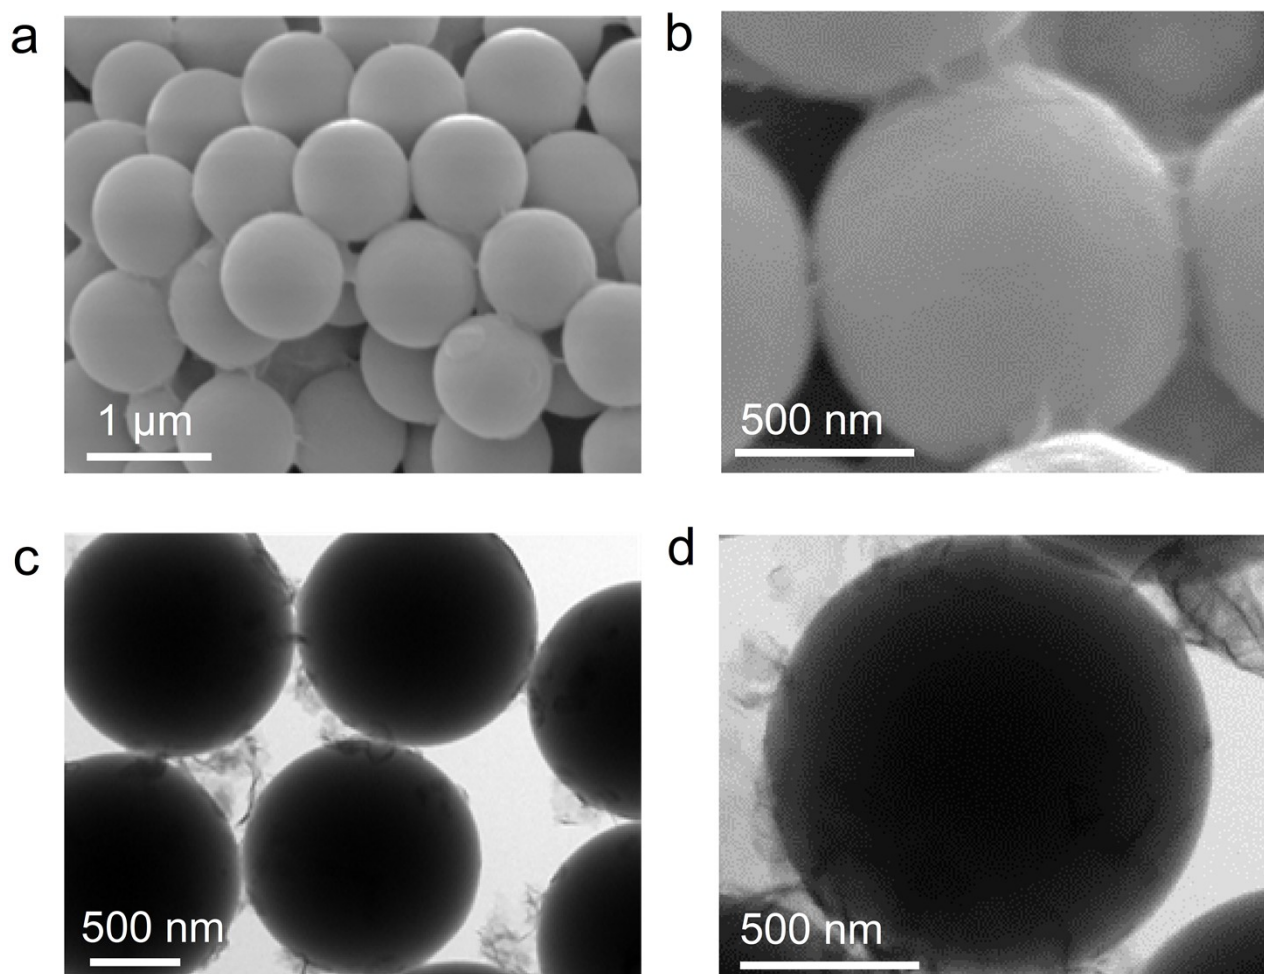

**Figure S2** (a-b) SEM and (c-d) TEM images of  $\text{Ti}_{0.87}\text{O}_2/\text{PS}$  sphere.

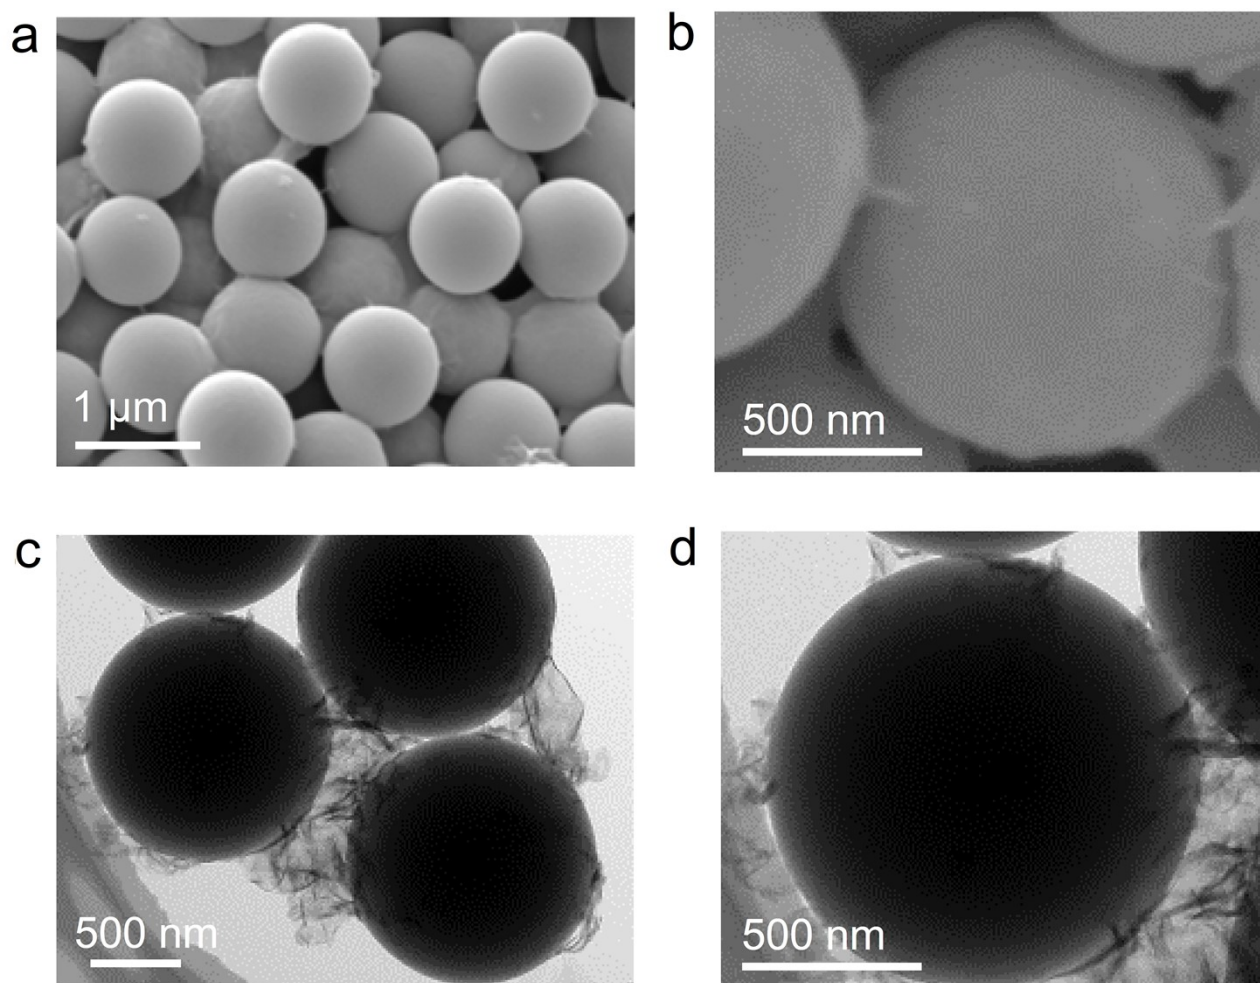

**Figure S3** (a-b) SEM and (c-d) TEM images of g-C<sub>3</sub>N<sub>4</sub>/Ti<sub>0.87</sub>O<sub>2</sub>/PS sphere.

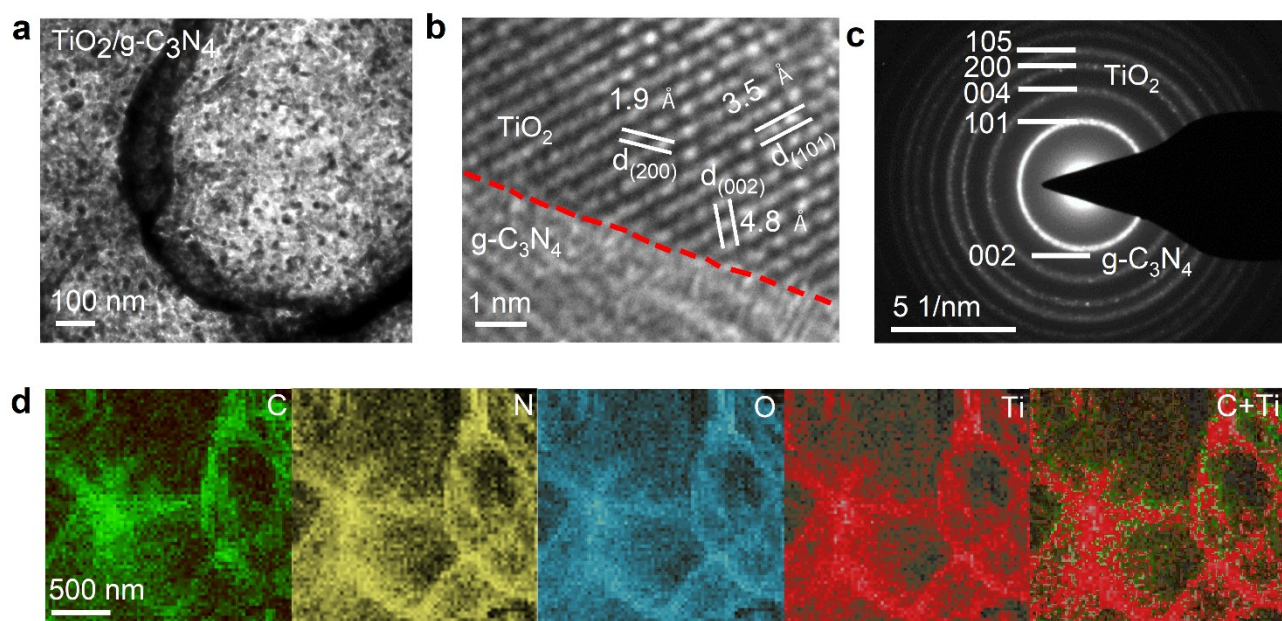

**Figure S4** (a) TEM micrographs, (b) high-resolution TEM image, (c) SAED pattern and (d) elemental distribution mapping of A-TiO<sub>2</sub>/g-C<sub>3</sub>N<sub>4</sub>.

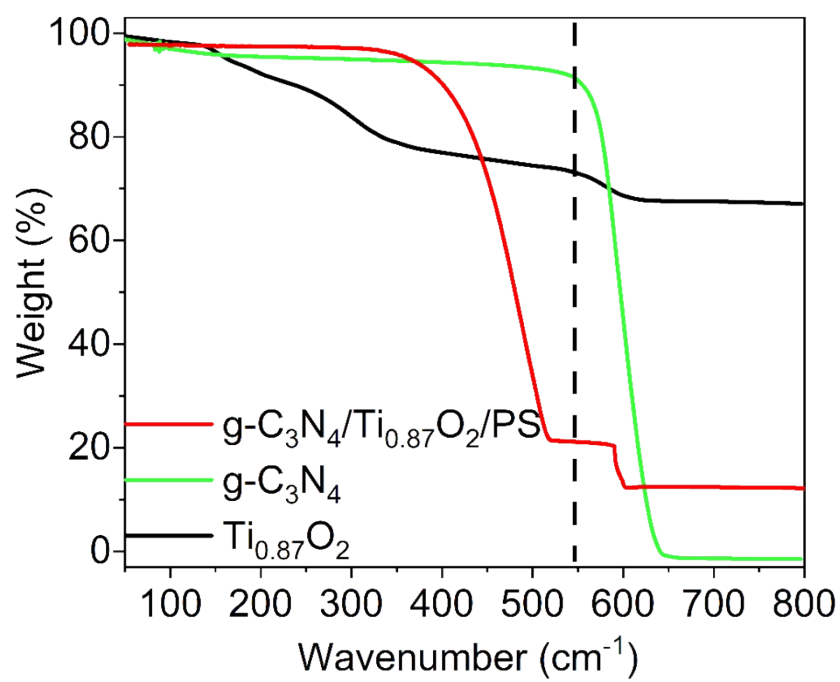

**Figure S5** TGA curve of g-C<sub>3</sub>N<sub>4</sub>/Ti<sub>0.87</sub>O<sub>2</sub>/PS, g-C<sub>3</sub>N<sub>4</sub> and Ti<sub>0.87</sub>O<sub>2</sub>.

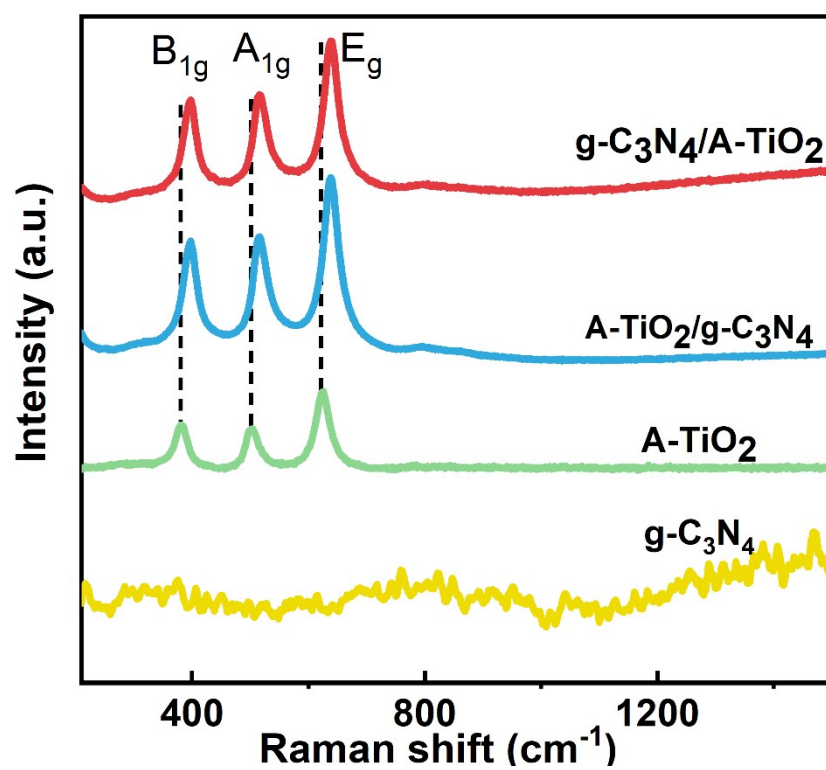

**Figure S6** The Raman spectra of g-C<sub>3</sub>N<sub>4</sub>/A-TiO<sub>2</sub>, A-TiO<sub>2</sub>/g-C<sub>3</sub>N<sub>4</sub>, A-TiO<sub>2</sub> and g-C<sub>3</sub>N<sub>4</sub>.

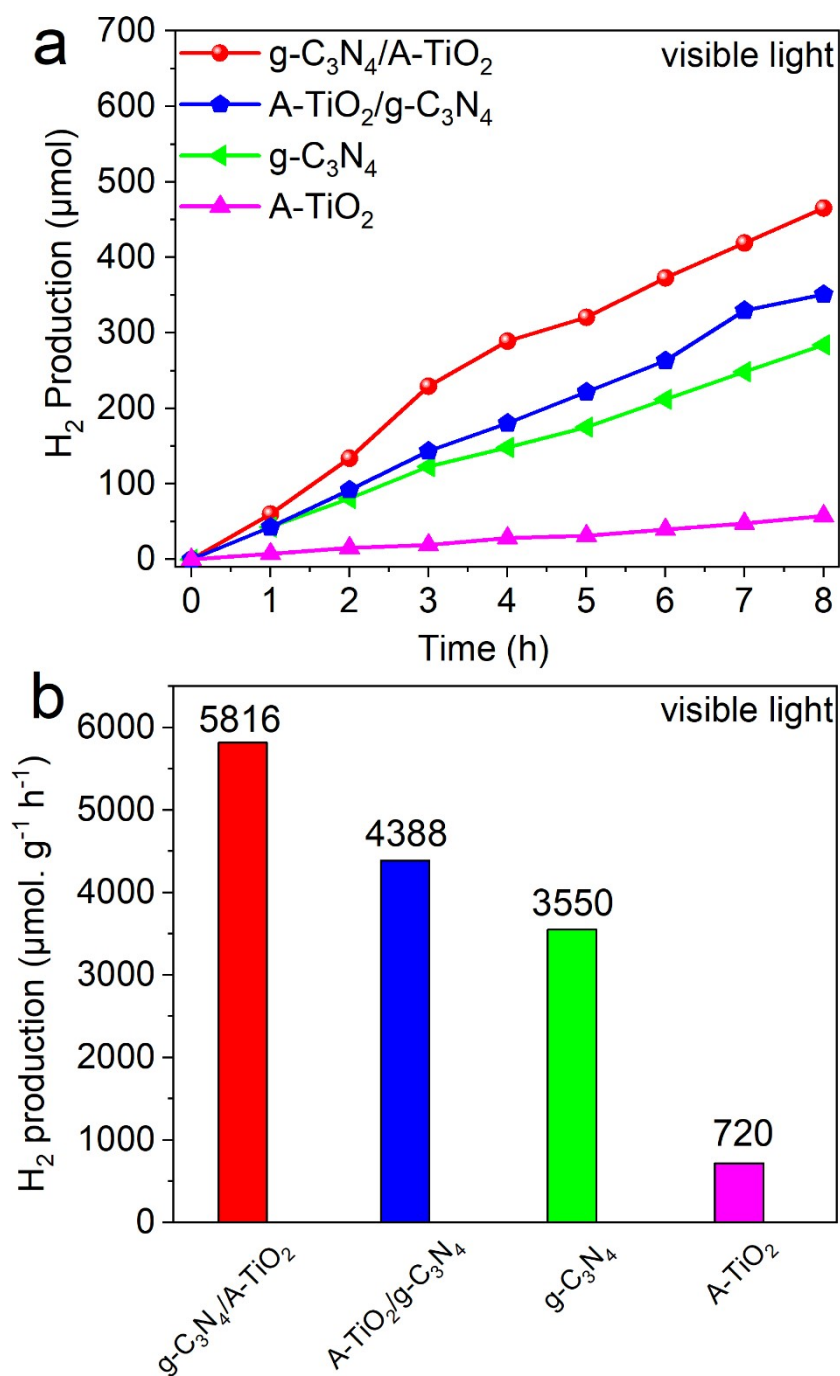

**Figure S7** (a) Time course of hydrogen evolution and (b) comparison of hydrogen evolution rates for g-C<sub>3</sub>N<sub>4</sub>/A-TiO<sub>2</sub>, A-TiO<sub>2</sub>/g-C<sub>3</sub>N<sub>4</sub>, A-TiO<sub>2</sub> and g-C<sub>3</sub>N<sub>4</sub> under visible light.

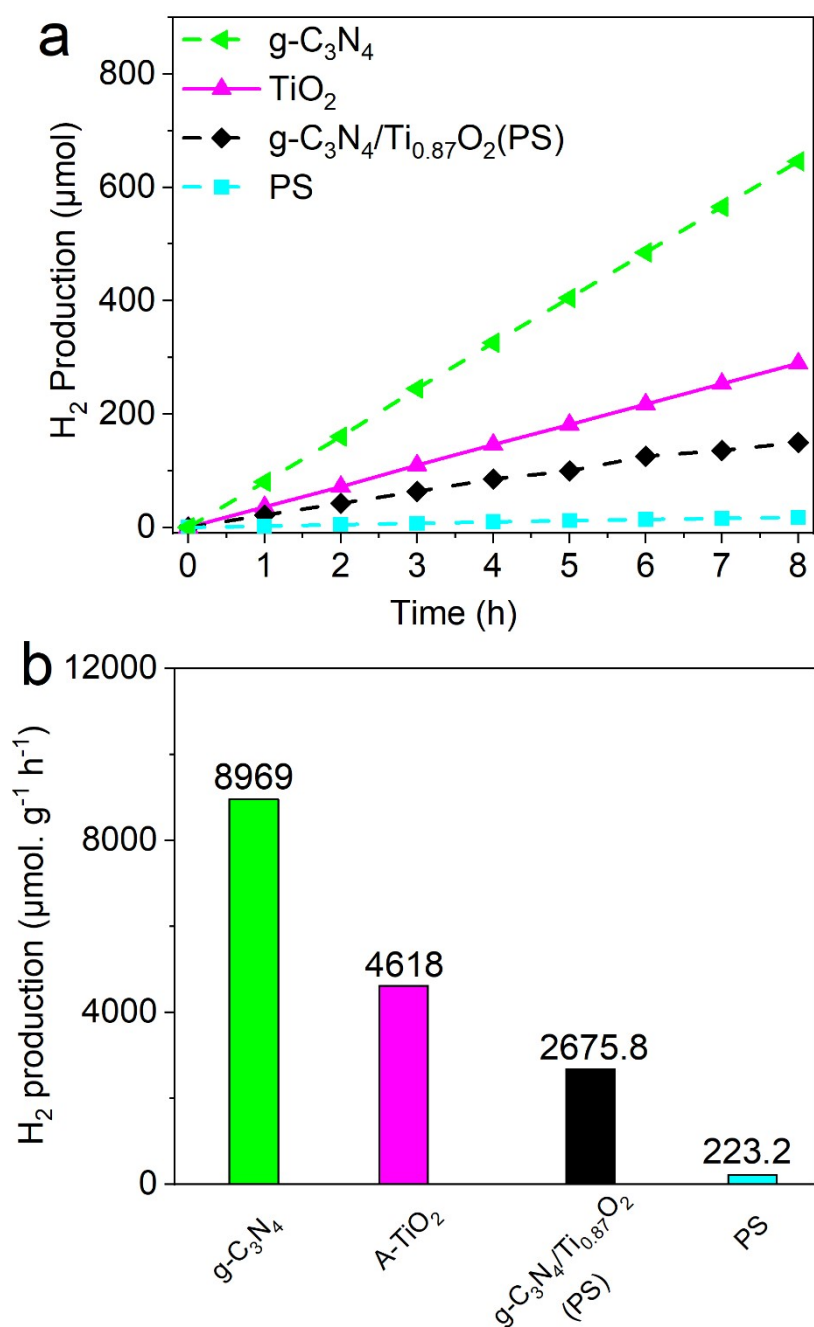

**Figure S8** (a) Time course of hydrogen evolution and (b) comparison of hydrogen evolution rates for A-TiO<sub>2</sub>, g-C<sub>3</sub>N<sub>4</sub>, g-C<sub>3</sub>N<sub>4</sub>/Ti<sub>0.87</sub>O<sub>2</sub>/PS and PS materials.

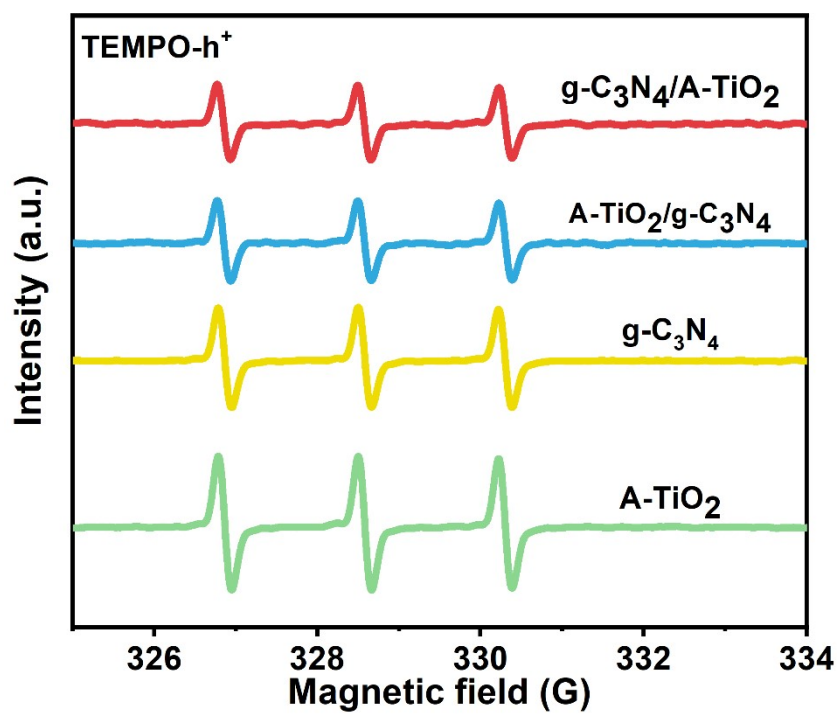

**Figure S9** ESR spectra of e<sup>-</sup> of g-C<sub>3</sub>N<sub>4</sub>/A-TiO<sub>2</sub>, A-TiO<sub>2</sub>/g-C<sub>3</sub>N<sub>4</sub>, g-C<sub>3</sub>N<sub>4</sub> and TiO<sub>2</sub> when exposed to solar light for a duration of 9 minutes.

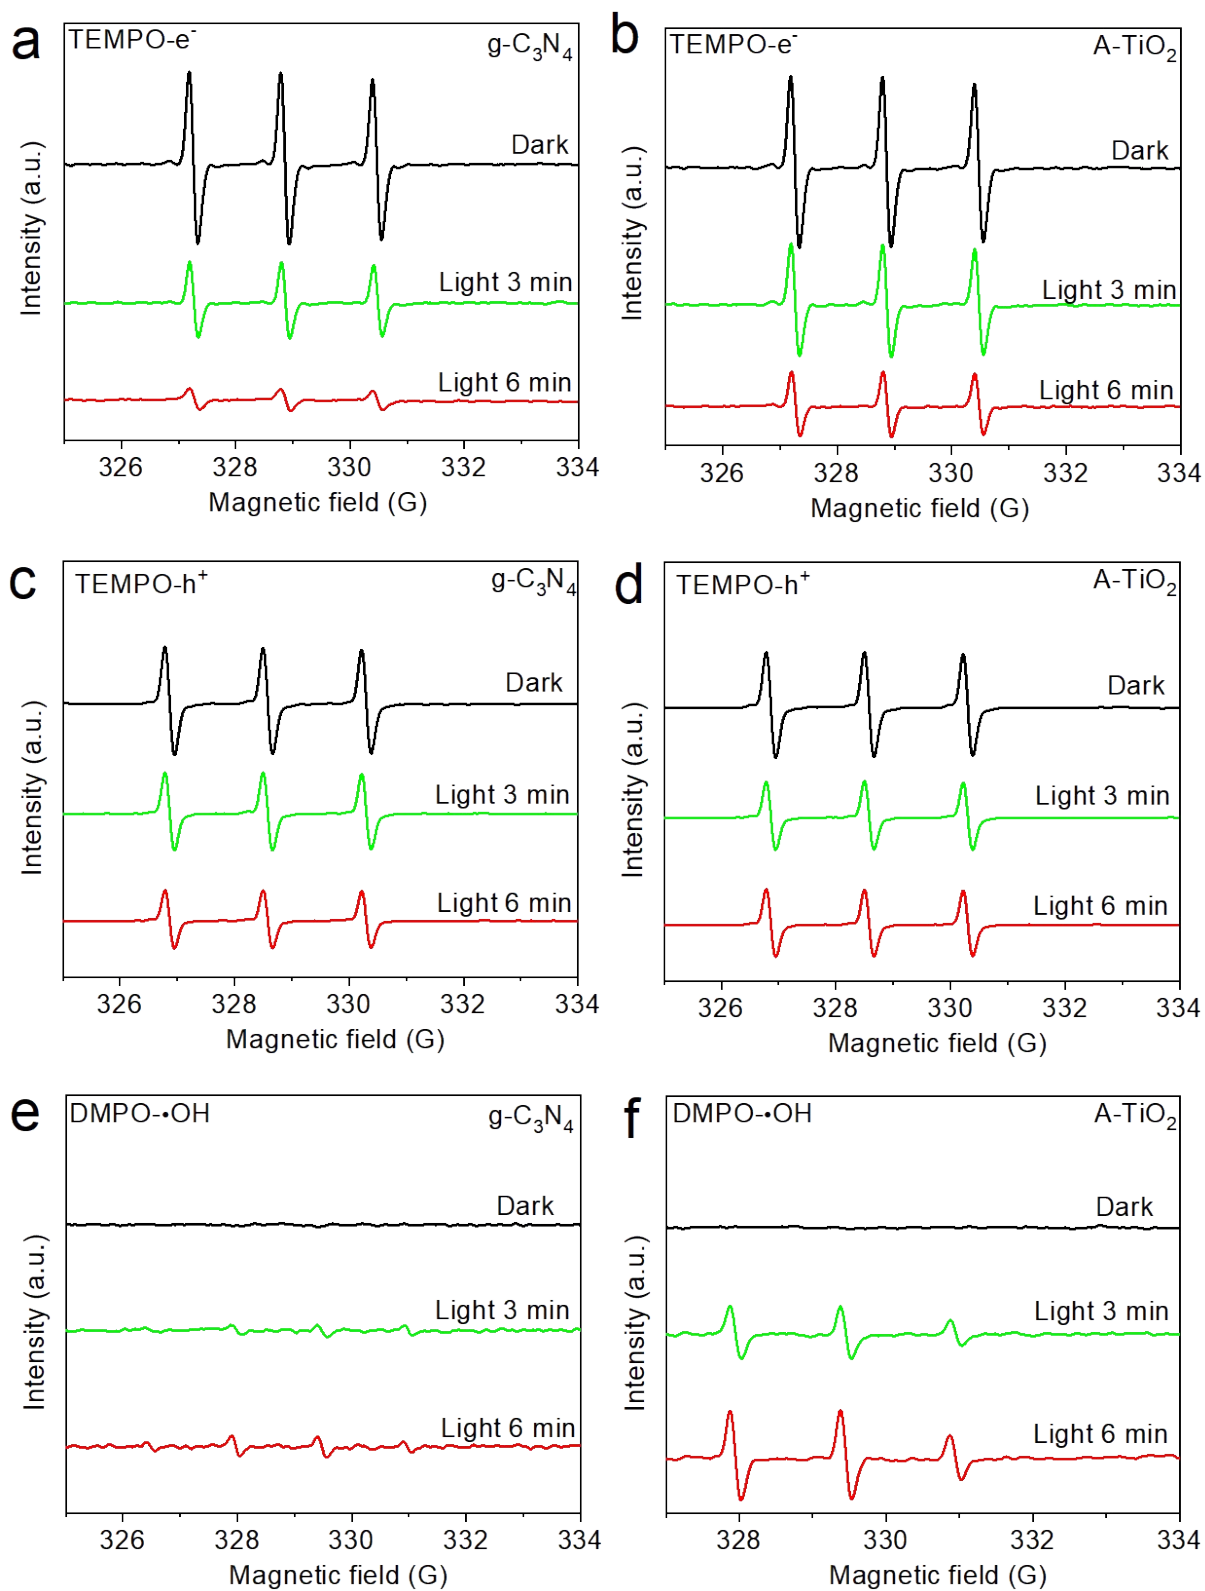

**Figure S10** ESR spectra of (a)  $e^-$  of  $g-C_3N_4$ , (b)  $e^-$  of  $TiO_2$ , (c)  $h^+$  of  $g-C_3N_4$ , (d)  $h^+$  of  $TiO_2$ , (e)  $\bullet OH$  of  $g-C_3N_4$  and (f)  $\bullet OH$  of  $TiO_2$  under solar light irradiation for various times.

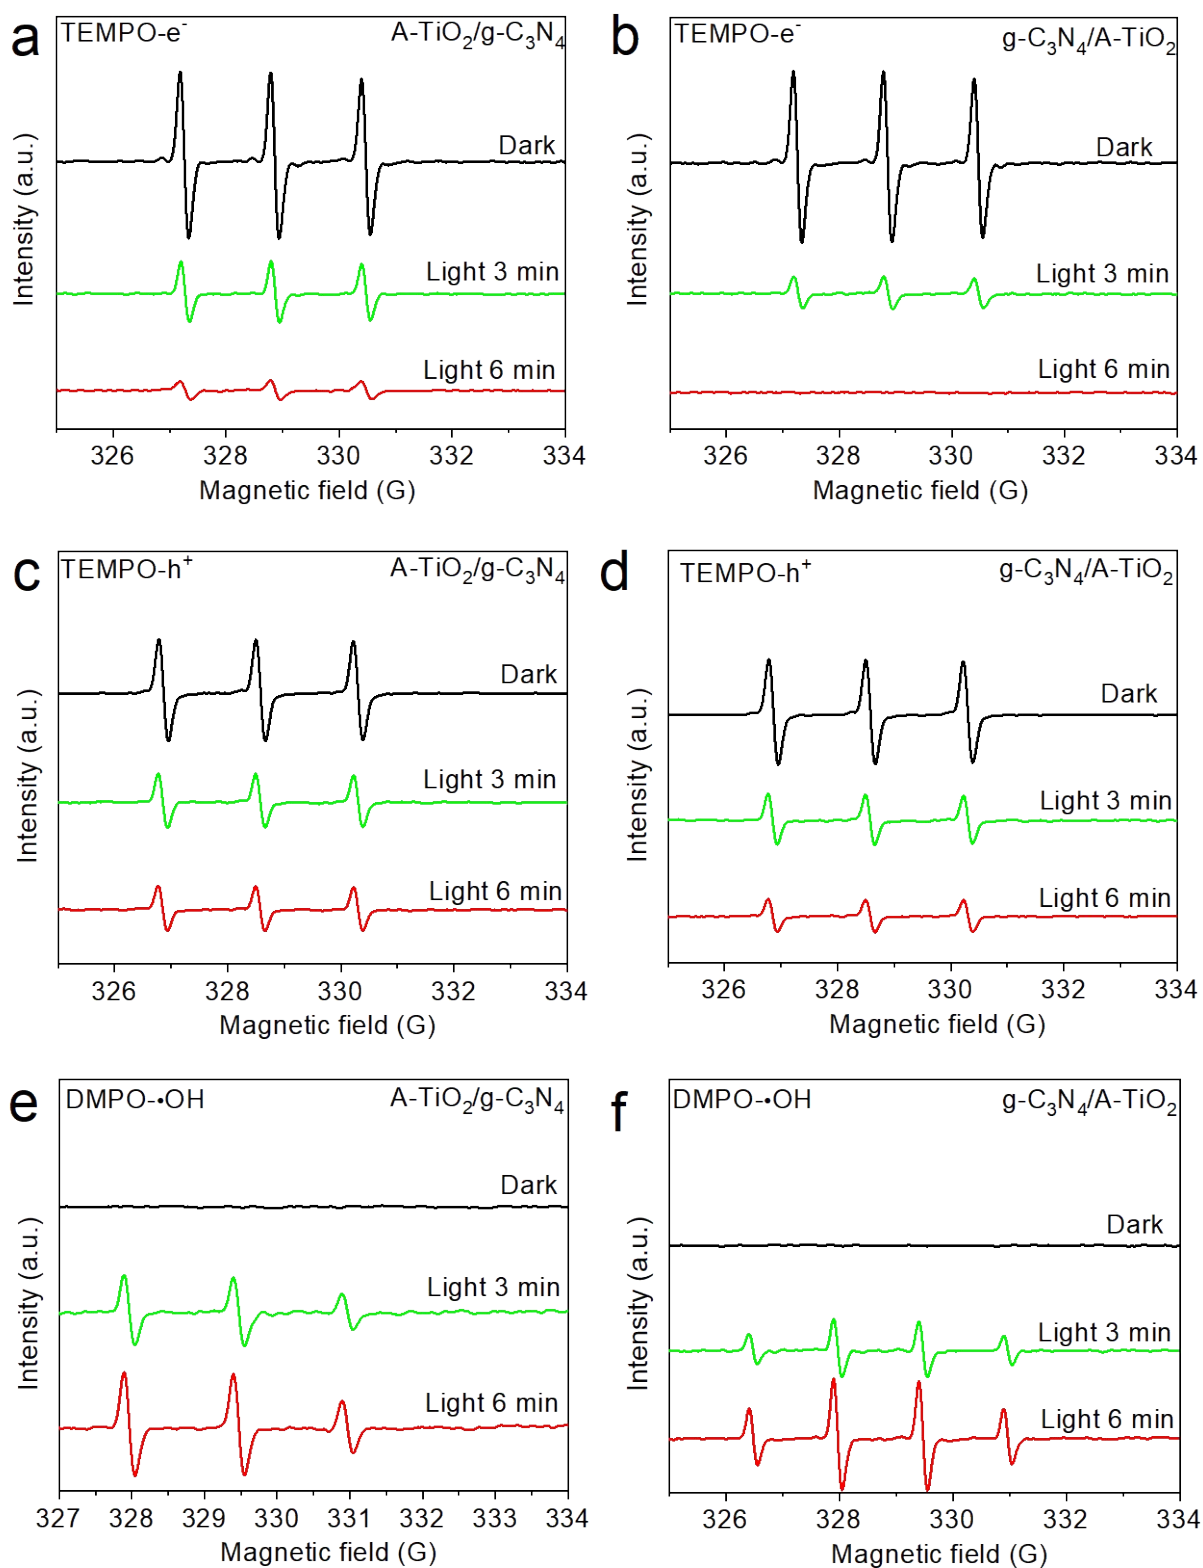

**Figure S11** ESR spectra of (a)  $e^-$  of A-TiO<sub>2</sub>/g-C<sub>3</sub>N<sub>4</sub>, (b)  $e^-$  of g-C<sub>3</sub>N<sub>4</sub>/ A-TiO<sub>2</sub>, (c)  $h^+$  of A-TiO<sub>2</sub>/g-C<sub>3</sub>N<sub>4</sub>, (d)  $h^+$  of g-C<sub>3</sub>N<sub>4</sub>/ A-TiO<sub>2</sub>, (e)  $\cdot$ OH of A-TiO<sub>2</sub>/g-C<sub>3</sub>N<sub>4</sub> and (f)  $\cdot$ OH of g-C<sub>3</sub>N<sub>4</sub>/ A-TiO<sub>2</sub> under solar light irradiation for various times.

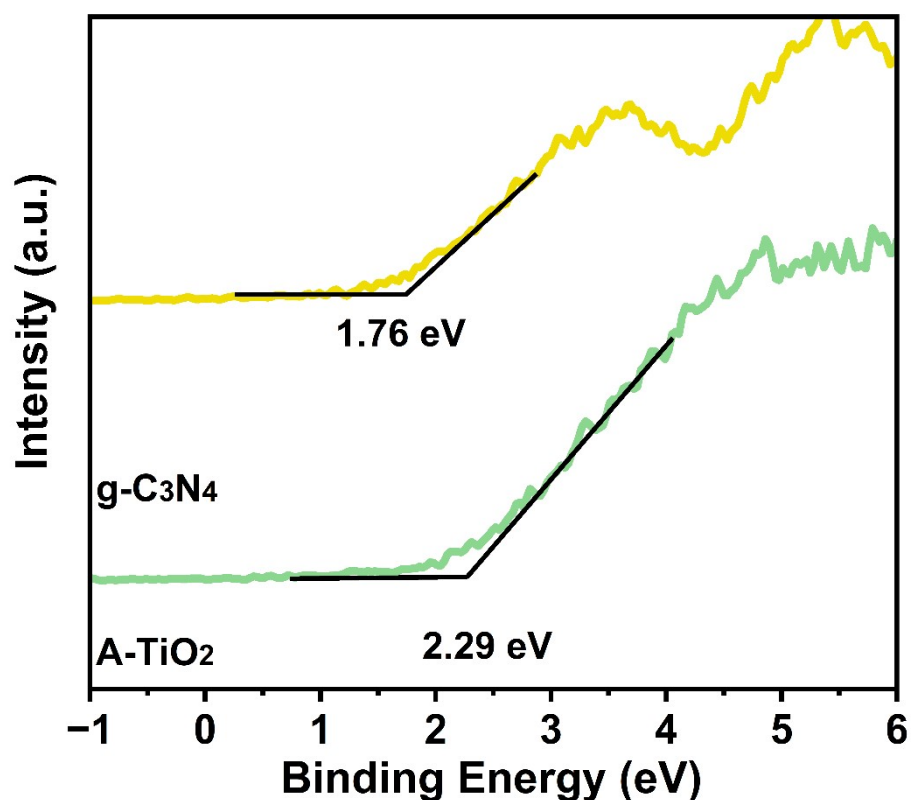

**Figure S12** VB-XPS survey of g-C<sub>3</sub>N<sub>4</sub> and TiO<sub>2</sub>.

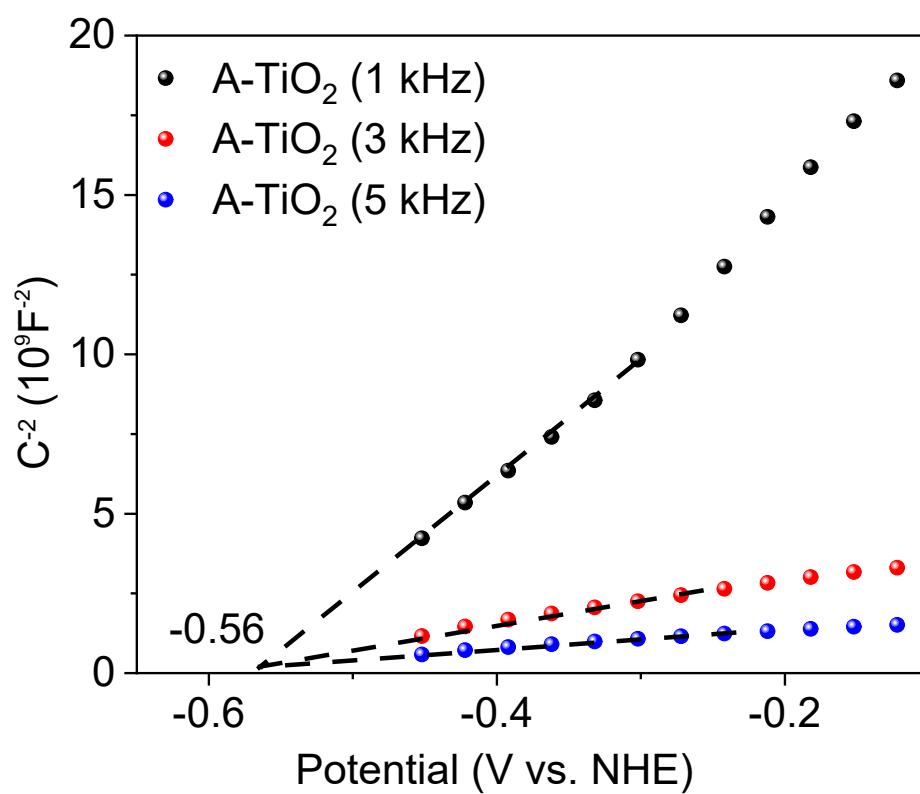

**Figure S13** Mott-Schottky plots at different frequencies of A-TiO<sub>2</sub>.

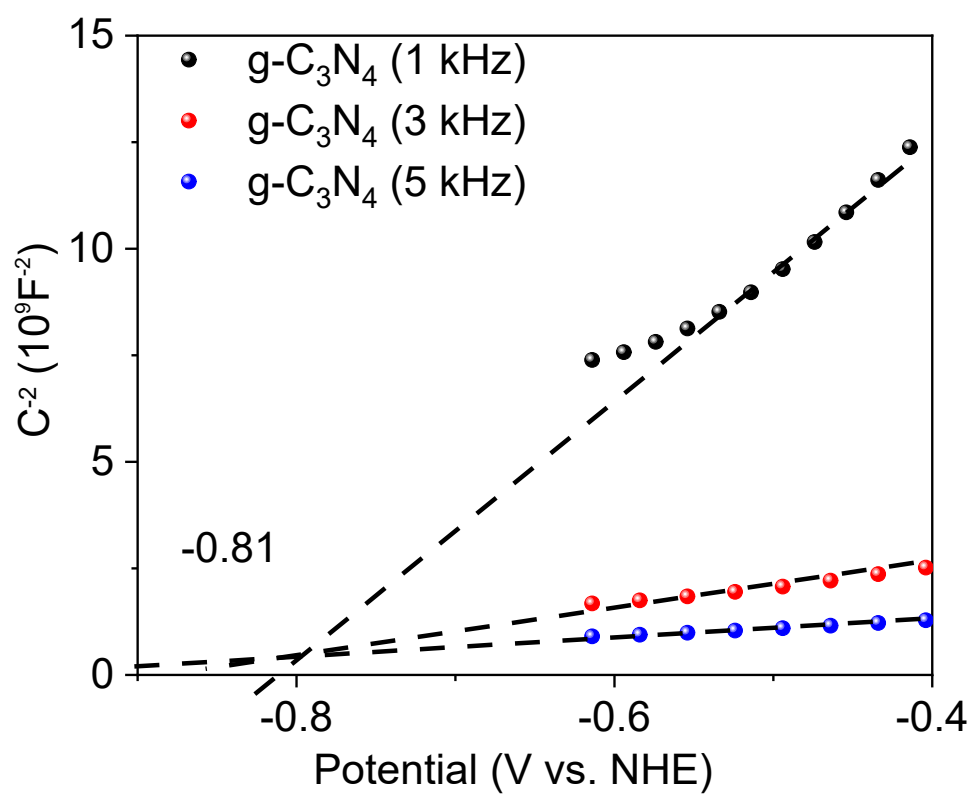

**Figure S14** Mott-Schottky plots at different frequencies of  $\text{g-C}_3\text{N}_4$ .

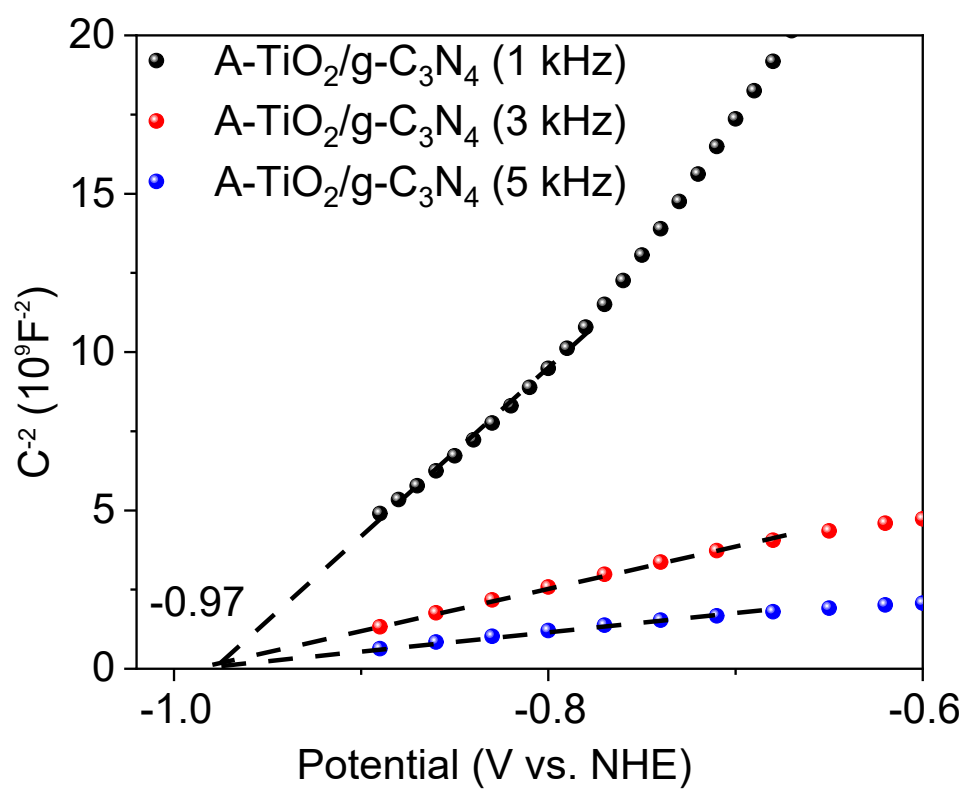

**Figure S15** Mott-Schottky plots at different frequencies of A-TiO<sub>2</sub>/g-C<sub>3</sub>N<sub>4</sub>.

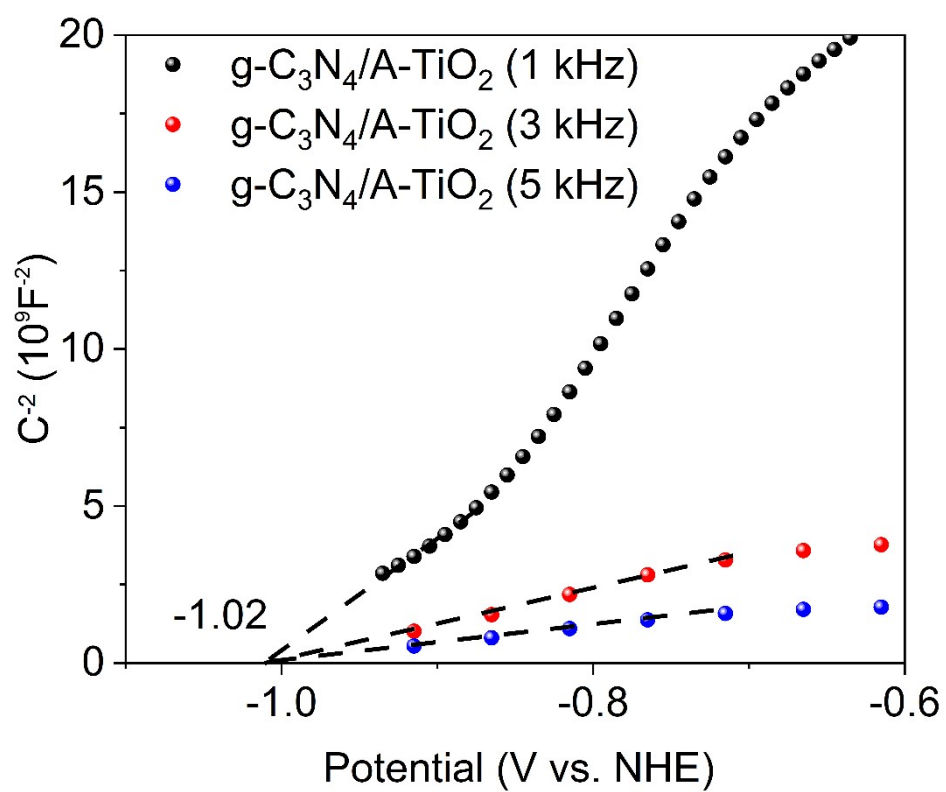

**Figure S16** Mott-Schottky plots at different frequencies of  $\text{g-C}_3\text{N}_4/\text{A-TiO}_2$ .

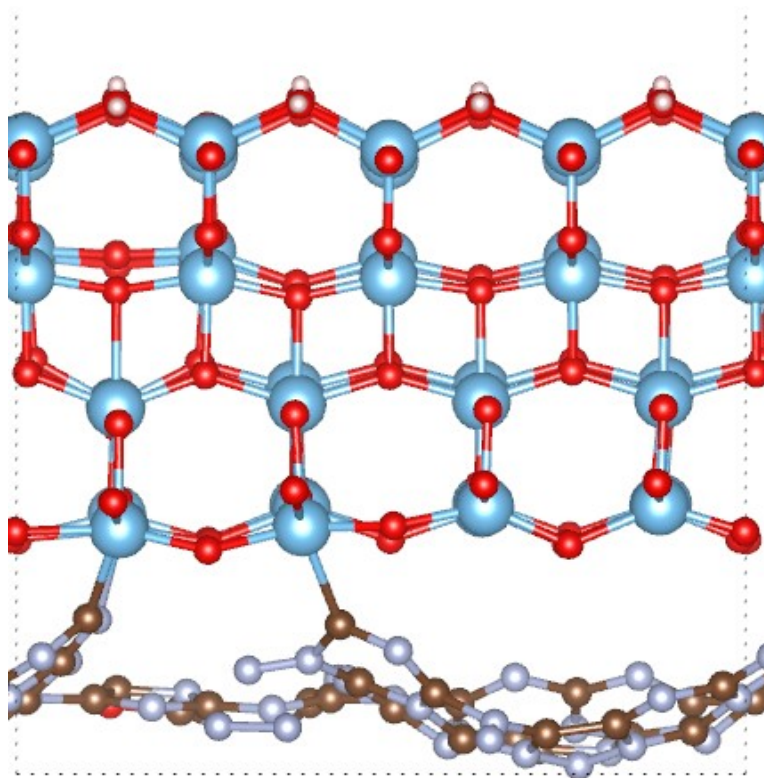

**Figure S17** The optimized structures of A-TiO<sub>2</sub>/g-C<sub>3</sub>N<sub>4</sub> heterostructure.

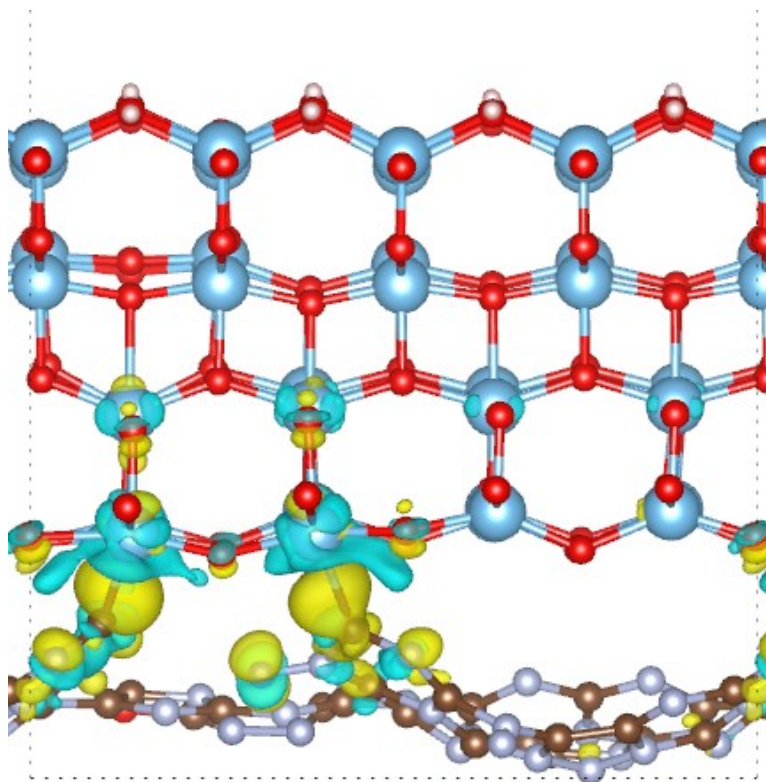

**Figure S18** Charge density difference of A-TiO<sub>2</sub>/g-C<sub>3</sub>N<sub>4</sub> heterostructure. The yellow and blue in the figure represent the accumulation and loss of electrons.

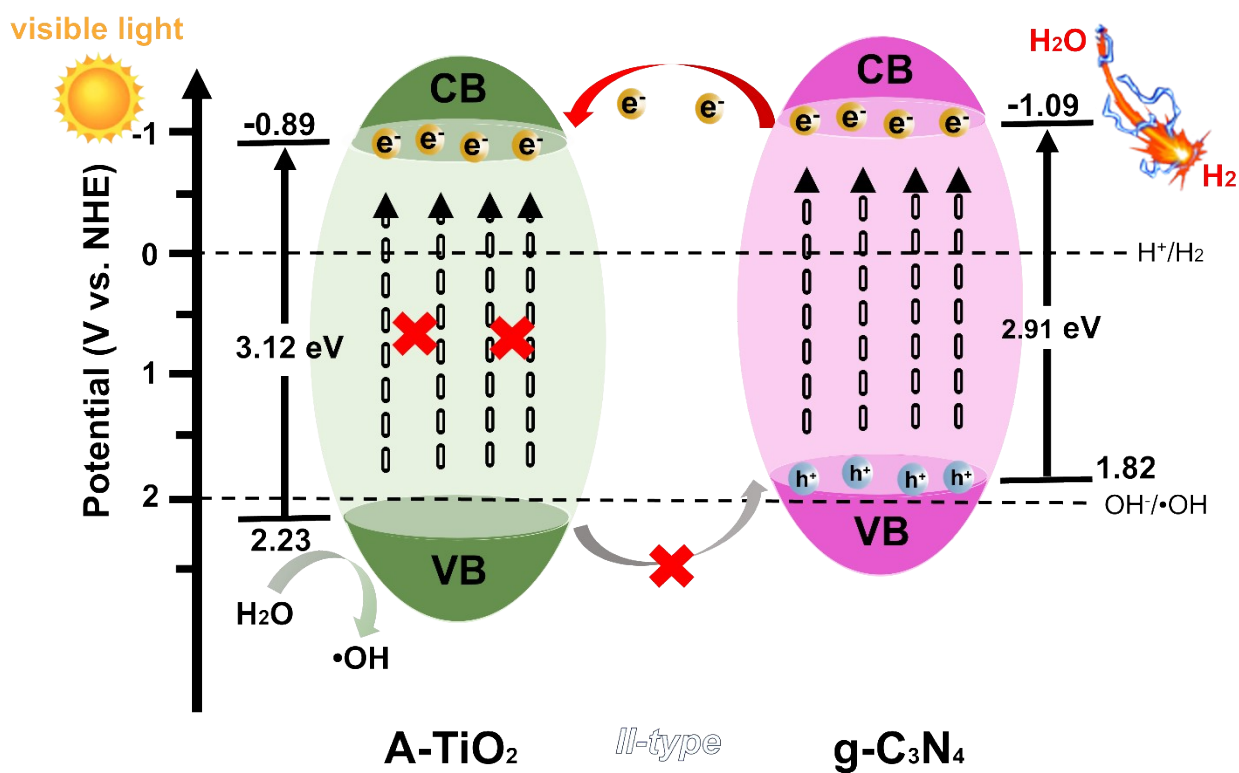

**Figure S19** An illustration of photocatalytic mechanism of  $\text{g-C}_3\text{N}_4/\text{TiO}_2$  under visible light.

**Table S1** Comparison of Zeta potential of samples in the pure water.

| Sample                            | Zeta Potential (mV) | Standard Deviation (mV) |
|-----------------------------------|---------------------|-------------------------|
| g-C <sub>3</sub> N <sub>4</sub>   | −12.8               | 5.72                    |
| Ti <sub>0.87</sub> O <sub>2</sub> | −35.5               | 4.54                    |
| PDDA/PS                           | +22.8               | 3.82                    |
